# Supplementary material for: Epichloë gansuensis Increases the Tolerance of Achnatherum inebrians to Low-P Stress by Modulating Amino Acids Metabolism and Phosphorus Utilization Efficiency
Source: MDPI journal article supplement (doi:10.3390/jof7050390), 2021-05-17
Supplement: s1 [file s1]

**Table S2.** Relative concentrations and fold changes in the levels of significantly different metabolites in roots of E+ and E- *A.inebrians* seedlings under low phosphorus stress. Fold changes were calculated using the formula  $\text{Log}_2^{(\text{RE+}/\text{RE-})}$  and  $\text{log}_2^{(0.01 \text{ mM}/0.5 \text{ mM})}$ . \*, \*\*, \*\*\* mean significant differences at  $P<0.05$ ;  $P<0.01$  and  $P<0.001$ , respectively.

| Metabolites name                    | 0.01 mM                |                     | Fold Changes<br>Log <sub>2</sub> <sup>(RE+/RE-)</sup> |
|-------------------------------------|------------------------|---------------------|-------------------------------------------------------|
|                                     | Relative concentration |                     |                                                       |
|                                     | RE+                    | RE-                 |                                                       |
| Cis-1,2-Dihydronaphthalene-1,2-diol | 112.71 ± 10.12         | 6.47 ± 6.47         | 4.12 ***                                              |
| Ribonic acid                        | 21.78 ± 21.78          | 131.18 ± 14.33      | -2.59 **                                              |
| Tryptophan                          | 22.53 ± 14.32          | 101.37 ± 22.04      | -2.17 *                                               |
| Maleic acid                         | 4353.06 ± 1517.48      | 8635.84 ± 658.09    | -0.99 *                                               |
| Gluconic acid                       | 1088.21 ± 242.66       | 193.55 ± 9.59       | 2.49 **                                               |
| Cortexolone                         | 43.87 ± 9.90           | 105.88 ± 10.65      | -1.27 **                                              |
| 5-Aminovaleric acid                 | 283.62 ± 65.95         | 515.30 ± 18.51      | -0.86 **                                              |
| Proline                             | 5621.40 ± 462.78       | 13221.57 ± 1234.01  | -1.23 ***                                             |
| Acetol                              | 46.71 ± 10.16          | 80.47 ± 4.64        | -0.78 *                                               |
| Leucine                             | 629.65 ± 66.17         | 1447.81 ± 125.26    | -1.20 ***                                             |
| 3-Methylglutaric acid               | 49.03 ± 6.98           | 27.03 ± 6.48        | 0.86 *                                                |
| Maleamate                           | 1284.51 ± 100.78       | 2466.03 ± 203.94    | -0.94 ***                                             |
| Asparagine                          | 31739.20 ± 1973.62     | 16926.31 ± 1390.00  | 0.91 ***                                              |
| D-Glutamic acid                     | 436.92 ± 27.61         | 231.55 ± 32.49      | 0.92 ***                                              |
| Ethanolamine                        | 8764.70 ± 985.01       | 15408.24 ± 1246.48  | -0.81 **                                              |
| Alanine                             | 78297.52 ± 7430.11     | 130879.38 ± 7682.73 | -0.74 ***                                             |
| 3-Cyano-L-alanine                   | 65566.20 ± 3491.10     | 38971.36 ± 4572.38  | 0.75 ***                                              |
|                                     | 0.5 mM                 |                     | Fold Changes<br>Log <sub>2</sub> <sup>(RE+/RE-)</sup> |
|                                     | Relative concentration |                     |                                                       |
|                                     | RE+                    | RE-                 |                                                       |
| Galactonic acid                     | 6.16 ± 2.57            | 0.003 ± 0.00        | 11.13 *                                               |
| 1-Kestose                           | 382.755 ± 81.513       | 61.99 ± 25.93       | 2.63 **                                               |
| Uridine                             | 90.31 ± 27.78          | 3.18 ± 0.69         | 4.83 *                                                |
| Isomaltose                          | 238.96 ± 78.48         | 39.64 ± 17.92       | 2.59 *                                                |
| Asparagine                          | 292.53 ± 33.49         | 50.32 ± 16.57       | 2.54 ***                                              |
| Cis-gondoic acid                    | 25.65 ± 2.76           | 6.78 ± 2.11         | 1.92 ***                                              |
| Phosphate                           | 1007.46 ± 40.52        | 392.66 ± 159.62     | 1.36 **                                               |
| 3-hydroxybutyric acid               | 223.03 ± 32.04         | 79.16 ± 22.57       | 1.49 **                                               |
| 3-Cyano-L-alanine                   | 1616.88 ± 168.88       | 589.59 ± 39.25      | 1.46 ***                                              |
| Proline                             | 3000.47 ± 285.41       | 1480.16 ± 171.72    | 1.02 **                                               |

|                                    |                      |                     |                                              |
|------------------------------------|----------------------|---------------------|----------------------------------------------|
| 1-Hexadecanol                      | 832.73 ± 81.76       | 421.33 ± 74.21      | 0.98 **                                      |
| 1,3-diaminopropane                 | 104.71 ± 12.52       | 219.72 ± 33.12      | -1.07 **                                     |
| Aspartic acid                      | 5370.21 ± 434.28     | 2837.17 ± 375.08    | 0.92 **                                      |
| Alanine                            | 28742.71 ± 2411.05   | 17560.24 ± 2302.60  | 0.71 **                                      |
| Gluconic acid                      | 749.07 ± 124.84      | 418.33 ± 51.65      | 0.84 *                                       |
| Tyrosine                           | 1229.14 ± 70.13      | 761.89 ± 143.81     | 0.69 *                                       |
| Maltotriose                        | 642.36 ± 79.38       | 385.61 ± 40.00      | 0.74 *                                       |
| Glutamic acid                      | 774.00 ± 44.31       | 499.91 ± 47.02      | 0.63 **                                      |
| <b>RE+</b>                         |                      |                     |                                              |
| Relative concentration             |                      | Fold Changes        |                                              |
|                                    | 0.01 mM              | 0.5 mM              | Log <sub>2</sub> <sup>(0.01 mM/0.5 mM)</sup> |
| Glutamine                          | 3133.63 ± 668.78     | 0.003 ± 0.00        | 20.13 ***                                    |
| D-Glutamic acid                    | 436.92 ± 27.61       | 0.003 ± 0.00        | 17.28 ***                                    |
| Benzoic acid                       | 133.22 ± 32.44       | 0.003 ± 0.00        | 15.57 **                                     |
| 6-phosphogluconic acid             | 2.04 ± 2.04          | 39.99 ± 5.03        | -4.29 ***                                    |
| Urea                               | 96.67 ± 19.76        | 0.49 ± 0.24         | 7.62 ***                                     |
| Biuret                             | 1981.33 ± 117.45     | 90.51 ± 40.96       | 4.45 ***                                     |
| 1-Aminocyclopropanecarboxylic acid | 34.45 ± 21.89        | 167.45 ± 10.04      | -2.28 ***                                    |
| Lysine                             | 6726.81 ± 454.80     | 534.10 ± 260.50     | 3.65 ***                                     |
| Glutaric Acid                      | 56.14 ± 35.57        | 222.33 ± 24.15      | -1.99 **                                     |
| Asparagine                         | 71188.01 ± 3123.29   | 292.53 ± 33.49      | 7.93 ***                                     |
| Phthalic acid                      | 259.51 ± 11.93       | 2.72 ± 1.09         | 6.58 ***                                     |
| Glucose-6-phosphate                | 0.002 ± 0.00         | 24.15 ± 8.07        | -13.66 *                                     |
| Phosphate                          | 354.30 ± 161.22      | 1007.42 ± 40.52     | -1.51 **                                     |
| 3-Cyano-L-alanine                  | 65566.19 ± 3491.10   | 1616.88 ± 168.88    | 5.34 ***                                     |
| 1-Kestose                          | 40.96 ± 16.64        | 382.76 ± 81.51      | -3.22 **                                     |
| Uridine                            | 3.14 ± 1.25          | 90.31 ± 27.78       | -4.84 *                                      |
| Ribitol                            | 1857.94 ± 270.77     | 652.15 ± 219.71     | 1.51 **                                      |
| Phosphomycin                       | 46.36 ± 15.32        | 169.94 ± 8.07       | -1.87 ***                                    |
| Lauric acid                        | 123.70 ± 47.07       | 285.588 ± 25.16     | -1.21 *                                      |
| Threonine                          | 46.24 ± 9.86         | 362.32 ± 8.57       | -2.97 ***                                    |
| Aspartic acid                      | 35567.04 ± 1886.73   | 5370.21 ± 434.28    | 2.73 ***                                     |
| L-Allothreonine                    | 16238.23 ± 822.45    | 3465.59 ± 192.14    | 2.23 ***                                     |
| Fructose                           | 146912.22 ± 29603.53 | 373164.16 ± 8045.34 | -1.34 ***                                    |
| Glycine                            | 10286.17 ± 1306.20   | 2531.83 ± 336.47    | 2.02 ***                                     |
| <b>RE-</b>                         |                      |                     |                                              |
| Relative concentration             |                      | Fold Changes        |                                              |
|                                    | 0.01 mM              | 0.5 mM              | Log <sub>2</sub> <sup>(0.01 mM/0.5 mM)</sup> |
| Glutamine                          | 5384.25 ± 2044.41    | 0.003 ± 0.00        | 20.9 *                                       |

|                                     |                      |                      |           |
|-------------------------------------|----------------------|----------------------|-----------|
| Biuret                              | 2104.12 ± 119.60     | 0.003 ± 0.00         | 19.55 *** |
| D-Glutamic acid                     | 231.55 ± 32.49       | 0.003 ± 0.00         | 16.36 *** |
| Cis-1,2-Dihydronaphthalene-1,2-diol | 6.47 ± 6.47          | 154.30 ± 24.40       | -4.58 *** |
| Lysine                              | 5439.91 ± 926.36     | 159.82 ± 101.11      | 5.09 ***  |
| Benzoic acid                        | 161.76 ± 43.64       | 28.32 ± 28.32        | 2.51 *    |
| 6-phosphogluconic acid              | 0.002 ± 0.00         | 36.32 ± 8.92         | -14.48 ** |
| Gluconic lactone                    | 64.94 ± 16.98        | 0.003 ± 0.00         | 14.53 **  |
| Asparagine                          | 43121.44 ± 3062.46   | 50.32 ± 16.57        | 9.74 ***  |
| Glycocyamine                        | 26.24 ± 6.39         | 0.003 ± 0.00         | 13.22 **  |
| Urea                                | 83.27 ± 9.27         | 2.04 ± 0.99          | 5.35 ***  |
| Maleic acid                         | 8635.84 ± 658.09     | 1625.53 ± 727.88     | 2.41 ***  |
| Ribitol                             | 1980.23 ± 267.28     | 481.92 ± 219.46      | 2.04 **   |
| 3-Cyano-L-alanine                   | 38971.36 ± 4572.38   | 589.59 ± 39.25       | 6.05 ***  |
| Fructose                            | 123659.34 ± 39542.13 | 445575.80 ± 16662.40 | -1.85 *** |
| Phthalic acid                       | 127.35 ± 8.17        | 4.70 ± 0.74          | 4.76 ***  |
| Tryptophan                          | 101.37 ± 22.04       | 23.89 ± 16.62        | 2.09 *    |
| Lauric acid                         | 83.11 ± 30.76        | 369.28 ± 35.90       | -2.15 *** |
| Threonine                           | 25.99 ± 9.98         | 346.77 ± 67.16       | -3.74 *** |
| Aspartic acid                       | 31046.49 ± 1476.09   | 2837.17 ± 375.08     | 3.45 ***  |
| Glutaric Acid                       | 86.39 ± 28.45        | 244.54 ± 25.31       | -1.5 **   |
| Proline                             | 13221.57 ± 1234.00   | 1480.16 ± 171.72     | 3.16 ***  |
| Alanine                             | 130879.38 ± 7682.73  | 17560.24 ± 2302.60   | 2.9 ***   |
| Glycine                             | 14128.19 ± 1138.62   | 2004.19 ± 164.70     | 2.82 ***  |
| Threitol                            | 25.90 ± 8.55         | 61.82 ± 5.52         | -1.26 **  |
| Oxoproline                          | 99455.60 ± 6816.90   | 18089.21 ± 2078.31   | 2.46 ***  |
| L-Allothreonine                     | 12947.93 ± 917.83    | 2471.45 ± 265.55     | 2.39 ***  |
| Maleamate                           | 2466.03 ± 203.94     | 491.438 ± 101.32     | 2.33 ***  |
| Serine                              | 27155.45 ± 1498.46   | 5632.65 ± 545.42     | 2.27 ***  |
| Glutamic acid                       | 2246.39 ± 97.56      | 499.91 ± 47.02       | 2.17 ***  |
| Thymidine                           | 95.15 ± 6.15         | 27.81 ± 5.61         | 1.77 ***  |

---
