# Supplementary material for: Epichloë gansuensis Increases the Tolerance of Achnatherum inebrians to Low-P Stress by Modulating Amino Acids Metabolism and Phosphorus Utilization Efficiency
Source: MDPI journal article supplement (doi:10.3390/jof7050390), 2021-05-17
Supplement: s1 [file s1]

**Table S1.** Relative concentrations and fold-changes in the levels of significantly different metabolites in leaves of E+ and E- *A. inebrians* seedlings under low phosphorus stress. Fold changes were calculated using the formula  $\text{Log}_2^{(\text{LE+}/\text{LE-})}$  and  $\text{Log}_2^{(0.01 \text{ mM}/0.5 \text{ mM})}$ . \*, \*\*, \*\*\* mean significant differences at  $P < 0.05$ ;  $P < 0.01$  and  $P < 0.001$ , respectively.

| Metabolites name        | 0.01 mM                |                    | Fold Changes<br>Log <sub>2</sub> <sup>(LE+/LE-)</sup>        |
|-------------------------|------------------------|--------------------|--------------------------------------------------------------|
|                         | Relative concentration |                    |                                                              |
|                         | LE+                    | LE-                |                                                              |
| Histidine               | 0.001 ± 0.00           | 121.38 ± 30.33     | -16.42 **                                                    |
| Lactulose               | 38.32 ± 38.31          | 799.22 ± 310.66    | -4.38 *                                                      |
| 5-Aminovaleric acid     | 268.10 ± 30.01         | 72.60 ± 46.06      | 1.88 **                                                      |
| Vanillin                | 197.55 ± 53.77         | 33.48 ± 33.48      | 2.56 *                                                       |
| Citric acid             | 26664.74 ± 12043.71    | 54918.77 ± 3620.41 | -1.04 *                                                      |
| 1-Kestose               | 1.56 ± 1.56            | 17.25 ± 6.73       | -3.46 *                                                      |
| Sedoheptulose           | 243.36 ± 70.39         | 1284.66 ± 124.17   | -2.40 ***                                                    |
| 4-hydroxycinnamic acid  | 145.39 ± 55.29         | 781.32 ± 78.71     | -2.43 ***                                                    |
| D-Glutamic acid         | 630.43 ± 38.80         | 199.45 ± 59.48     | 1.66 ***                                                     |
| 1-Hexadecanol           | 94.46 ± 31.88          | 312.88 ± 36.80     | -1.73 **                                                     |
| Ascorbate               | 74.55 ± 28.67          | 255.25 ± 36.88     | -1.78 **                                                     |
| Pyruvic acid            | 228.19 ± 53.15         | 379.42 ± 29.09     | -0.73 *                                                      |
| 4-Acetamidobutyric acid | 11011.04 ± 982.49      | 3786.65 ± 1175.53  | 1.54 ***                                                     |
|                         | 0.5 mM                 |                    | Fold Changes<br>Log <sub>2</sub> <sup>(LE+/LE-)</sup>        |
|                         | Relative concentration |                    |                                                              |
|                         | LE+                    | LE-                |                                                              |
| Benzoic acid            | 21.23 ± 21.23          | 118.63 ± 9.68      | -2.48 **                                                     |
| Citramalic acid         | 136.63 ± 8.54          | 75.57 ± 24.25      | 0.85 *                                                       |
| Cortexolone             | 573.28 ± 172.47        | 3346.60 ± 732.10   | -2.55 **                                                     |
| Salicylic acid          | 577.95 ± 162.73        | 203.98 ± 40.80     | 1.50 *                                                       |
|                         | LE+                    |                    | Fold Changes<br>Log <sub>2</sub> <sup>(0.01 mM/0.5 mM)</sup> |
|                         | Relative concentration |                    |                                                              |
|                         | 0.01 mM                | 0.5 mM             |                                                              |
| Lysine                  | 6262.47 ± 965.22       | 0.002 ± 0.00       | 21.75 ***                                                    |
| Glutamine               | 4834.62 ± 1642.77      | 0.002 ± 0.00       | 21.37 *                                                      |
| Biuret                  | 825.17 ± 60.91         | 0.002 ± 0.00       | 18.82 ***                                                    |
| D-Glutamic acid         | 630.43 ± 38.80         | 0.002 ± 0.00       | 18.44 ***                                                    |
| Asparagine              | 47899.74 ± 5352.97     | 4.70 ± 3.22        | 13.32 ***                                                    |
| Noradrenaline           | 217.28 ± 20.63         | 0.002 ± 0.00       | 16.90 ***                                                    |
| Orotic acid             | 98.08 ± 14.36          | 0.002 ± 0.00       | 15.75 ***                                                    |

|                                    |                     |                                              |           |
|------------------------------------|---------------------|----------------------------------------------|-----------|
| O-acetylserine                     | 25.41 ± 1.80        | 0.002 ± 0.00                                 | 13.80 *** |
| Saccharic acid                     | 662.07 ± 211.23     | 95.54 ± 95.54                                | 2.79 *    |
| Vanillin                           | 197.55 ± 53.77      | 0.002 ± 0.00                                 | 16.76 **  |
| Benzoic acid                       | 110.64 ± 6.63       | 21.232 ± 21.23                               | 2.38 **   |
| Urea                               | 471.77 ± 37.56      | 1.45 ± 0.78                                  | 8.34 ***  |
| Glucose-6-phosphate                | 8.15 ± 5.88         | 346.07 ± 144.65                              | -5.41 *   |
| 3-Cyano-L-alanine                  | 20497.05 ± 2139.44  | 41.64 ± 17.16                                | 8.94 ***  |
| Glycocyanine                       | 67.08 ± 14.47       | 7.69 ± 4.86                                  | 3.12 **   |
| Taxifolin                          | 153.65 ± 50.15      | 0.002 ± 0.00                                 | 16.40 *   |
| Citric acid                        | 26664.74 ± 12043.71 | 63433.32 ± 3990.86                           | -1.25 *   |
| Alpha-ketoisocaproic acid          | 39.27 ± 12.55       | 0.002 ± 0.00                                 | 14.43 *   |
| Xylitol                            | 33.20 ± 3.47        | 7.871 ± 5.01                                 | 2.08 **   |
| 4-Methylcatechol                   | 10.47 ± 3.51        | 0.002 ± 0.00                                 | 12.52 *   |
| Thymol                             | 88.21 ± 4.23        | 21.84 ± 10.95                                | 2.01 ***  |
| Tyrosine                           | 6016.24 ± 1919.57   | 148.33 ± 85.20                               | 5.34 *    |
| Proline                            | 12930.79 ± 1397.58  | 404.89 ± 173.63                              | 5.00 ***  |
| 1-Kestose                          | 1.56 ± 1.56         | 79.87 ± 26.67                                | -5.68 *   |
| Thymidine                          | 142.18 ± 26.82      | 15.77 ± 5.19                                 | 3.17 ***  |
| Indole-3-acetamide                 | 28.36 ± 9.44        | 0.74 ± 0.74                                  | 5.26 *    |
| Isoleucine                         | 14490.68 ± 1313.03  | 1174.12 ± 177.00                             | 3.63 ***  |
| Phosphomycin                       | 39.04 ± 13.03       | 140.65 ± 10.26                               | -1.85 *** |
| Putrescine                         | 10388.99 ± 687.66   | 1194.62 ± 303.56                             | 3.12 ***  |
| Itaconic acid                      | 641.23 ± 84.83      | 319.49 ± 102.13                              | 1.01 *    |
| Phenylalanine                      | 6424.97 ± 651.36    | 793.07 ± 131.54                              | 3.02 ***  |
| <b>LE-</b>                         |                     |                                              |           |
| Relative concentration             |                     | Fold Changes                                 |           |
| 0.01 mM                            |                     | Log <sub>2</sub> <sup>(0.01 mM/0.5 mM)</sup> |           |
| Lysine                             | 4992.98 ± 740.86    | 0.002 ± 0.00                                 | 21.51 *** |
| Asparagine                         | 27917.25 ± 4577.11  | 0.87 ± 0.87                                  | 14.96 *** |
| Glutamine                          | 3580.71 ± 1058.28   | 0.002 ± 0.00                                 | 21.03 **  |
| 4-Acetamidobutyric acid            | 3786.65 ± 1175.53   | 0.002 ± 0.00                                 | 21.11 **  |
| Biuret                             | 693.46 ± 42.98      | 0.002 ± 0.00                                 | 18.67 *** |
| Noradrenaline                      | 275.88 ± 40.09      | 0.002 ± 0.00                                 | 17.33 *** |
| 3-Cyano-L-alanine                  | 8765.00 ± 1301.83   | 16.976 ± 11.24                               | 9.01 ***  |
| Alpha-Tocopherol                   | 60.85 ± 60.85       | 670.59 ± 139.77                              | -3.46 **  |
| Histidine                          | 121.38 ± 30.33      | 0.002 ± 0.00                                 | 16.15 **  |
| D-Glutamic acid                    | 199.45 ± 59.48      | 0.002 ± 0.00                                 | 16.86 **  |
| 1-Aminocyclopropanecarboxylic acid | 11.08 ± 11.08       | 116.71 ± 5.80                                | -3.40 *** |

|                        |                    |                  |          |
|------------------------|--------------------|------------------|----------|
| Urea                   | 260.75 ± 40.48     | 1.42 ± 1.02      | 7.52 *** |
| Thymidine              | 181.85 ± 38.50     | 8.40 ± 5.31      | 4.43 **  |
| Glucose-6-phosphate    | 14.80 ± 9.36       | 285.33 ± 110.87  | -4.27 *  |
| Putrescine             | 7328.38 ± 783.06   | 458.24 ± 205.62  | 4.00 *** |
| Oxalacetic acid        | 171.73 ± 29.17     | 32.93 ± 25.65    | 2.38 **  |
| Tyrosine               | 11919.11 ± 1530.37 | 134.28 ± 76.86   | 6.47 *** |
| Orotic acid            | 62.77 ± 13.55      | 7.14 ± 7.14      | 3.14 **  |
| O-acetylserine         | 24.77 ± 8.05       | 0.002 ± 0.00     | 13.86 *  |
| Itaconic acid          | 528.91 ± 44.95     | 126.582 ± 67.51  | 2.06 *** |
| Gentisic acid          | 25.397 ± 16.16     | 198.52 ± 46.71   | -2.97 ** |
| Glycocyamine           | 50.19 ± 16.76      | 3.46 ± 3.46      | 3.86 *   |
| Pelargonic acid        | 30.14 ± 19.07      | 170.60 ± 54.57   | -2.51 *  |
| Proline                | 7005.05 ± 1292.10  | 347.90 ± 97.31   | 4.33 *** |
| 6-phosphogluconic acid | 24.16 ± 8.77       | 218.495 ± 42.03  | -3.18 ** |
| Phthalic acid          | 112.50 ± 32.27     | 0.522 ± 0.26     | 7.75 **  |
| Indole-3-acetamide     | 30.26 ± 11.07      | 3.509 ± 3.507    | 3.11 *   |
| Cholic acid            | 889.32 ± 80.68     | 66.33 ± 21.02    | 3.75 *** |
| Maltotriose            | 51.42 ± 17.37      | 275.82 ± 83.84   | -2.42 *  |
| Pantothenic acid       | 311.67 ± 74.60     | 64.32 ± 53.00    | 2.28 *   |
| Isoleucine             | 13103.16 ± 3297.08 | 1296.15 ± 102.21 | 3.34 *   |
| Phenylalanine          | 5751.03 ± 367.50   | 862.41 ± 65.19   | 2.74 *** |

---
